# Supplementary material for: Trace and ultratrace elements in spinel subgroup minerals of ultramafic rocks from the Voltri Massif (NW Italy): the influence of microstructure and texture
Source: Copernicus journal article supplement (doi:10.5194/ejm-35-1091-2023), 2023-12-12
Supplement: Supplementary file 1 [file ejm-35-1091-2023-supplement.zip]

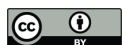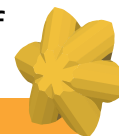

*Supplement of*

**Trace and ultratrace elements in spinel subgroup minerals of ultramafic rocks from the Voltri Massif (NW Italy): the influence of microstructure and texture**

**Silvia Fornasaro et al.**

*Correspondence to:* Silvia Fornasaro ([silvia.fornasaro@unipi.it](mailto:silvia.fornasaro@unipi.it))

- [ejm-35-1091-2023-supplement-title-page.pdf](#)
- Supplementary
  - [Table EMPA.xlsx](#)
  - [Table LA-ICP.xlsx](#)

The copyright of individual parts of the supplement might differ from the article licence.
