# Supplementary material for: Trace and ultratrace elements in spinel subgroup minerals of ultramafic rocks from the Voltri Massif (NW Italy): the influence of microstructure and texture
Source: Copernicus journal article supplement (doi:10.5194/ejm-35-1091-2023), 2023-12-12
Supplement: Supplementary file 1 [file Table EMPA.xlsx]

## Sheet: EMPA
Rock	Partially serpentinized peridotites																												Massive serpentinites
Microstructure	Porphyroclasts																										Serpentine mesh texture		Porphyroclasts					Re-crystalized porphyroclasts														Serpentine mesh texture
Minerals	Cr-Spinel															Ferrian chromite		Cr-Magnetite								Magnetite	Magnetite		Ferrian chromite	Cr-Magnetite				Magnetite														Magnetite
Sample	RG_R1Ba-P1-1	RG_R1Ba-P1-2	RG_R1Ba-P2-13	RG_R1Ba-P2-14	RG_R1Ba-P4-19	RG_R1Ba-P4-20	RG_R2Ba-P1-1	RG_R2Ba-P1-13	RG_R2Ba-P1-14	RG_R2Ba-P1-2	RG_R2Ba-P3-17	RG_R2Ba-P3-18	RG_R4-P2a-1	RG_R4-P2a-2	RG_R4-P2a-3	RG_R2Ba-P1-15	RG_R4-P2a-7	RG_R1Ba-P2-15	RG_R1Ba-P2-16	RG_R2Ba-P1-16	RG_R2Ba-P1-4	RG_R2Ba-P3-19	RG_R4-P2a-4	RG_R4-P2a-5	RG_R4-P2a-6	RG_R4-P2a-8	RG_R4-P1-1	RG_R4-P1-5	BG_R4-P3-6	BG_R3-P5-4	BG_R3-P5-5	BG_R4-P1-10	BG_R4-P2-1	BG_R3-P4-1	BG_R3-P4-3	BG_R3-P4-4	BG_R3-P4-5	BG_R3-P4-6	BG_R3-P5-11	BG_R3-P5-2	BG_R4-P1-11	BG_R4-P1-12	BG_R4-P2-2	BG_R4-P2-3	BG_R4-P2-4	BG_R4-P3-7	BG_R4-P3-9	BG_R3-P6-1	BG_R3-P6-3
SiO2	0.0789	0.0759	0.0397	0.0638	0.0388	0.0404	0.0357	0.0826	0.0755	0.0678	0.0294	0.0266	0.009	0	0.0081	0.0124	0.0677	0.0878	0.8442	0.0794	0.4302	0.8709	0.0921	0.0347	0.0969	0.0843	0.2414	0.6866	0.0153	0.0455	0.0398	0.077	0.0361	0.0239	0.0331	0.0501	0.0094	0.0331	0.0067	0.0399	0.0001	0.035	0.06	0.0426	0.041	0.0211	0.0153	0.02	0.0564
TiO2	0.1485	0.0909	0.1016	0.1244	0.1457	0.2158	0.4365	0.2848	0.2412	0.2961	0.2303	0.3598	0.0661	0.0317	0.0086	0.4972	0.4151	0.2412	0.251	0.626	0.5263	0.4184	0.3823	0.303	0.3386	0.1395	0.0012	0.0136	0.6231	0.5434	0.5449	0.6956	0.6409	0.1533	0.1478	0.117	0.1227	0.1455	0.1689	0.1654	0.2259	0.2374	0.1967	0.084	0.122	0.1604	0.1797	0.1284	0.0818
Al2O3	44.31	44.86	44.09	44.03	42.6	41.88	34.16	31.39	31.61	34	33	33.03	33.91	32.79	32.57	2.95	8.12	1.7901	2.31	0.7592	1.6523	2.12	1.93	3.64	1.8542	0.2928	0.0203	0.031	0.0867	0.0717	0.0683	0.0641	0.067	0	0.0173	0.0157	0.0208	0.0073	0.0318	0.0264	0.0153	0.0297	0	0.0119	0	0.0275	0.0346	0.0262	0.0154
Cr2O3	21.73	21.38	22.58	22.02	24.63	24.7	30.21	30.11	30.43	30.88	29.62	30.69	29.26	29.45	28.95	31.61	36.37	19.32	19.22	26.21	24.68	25.1	24.57	24.49	24.2	7.21	0.0194	0.0181	36.2	22.9	20.41	22.61	19.79	0.959	1.0169	0.9096	0.6649	1.0554	3.6	3.79	2.05	2.75	1.98	1.0982	2.53	0.7671	1.59	1.1222	1.2145
FeO	20.16	21.07	16.51	18.61	17.32	18.11	21.23	28.29	27.61	20.14	25.93	23.04	29.01	30.31	31.1	57.57	49.63	71.86	71.67	65.98	65.48	64.68	65.99	65.02	66.69	86.73	92	91.38	57.37	65.97	69.8	70.26	73.31	89.83	90.25	90.24	90.41	90	89.04	88.02	91.4	90.09	91.58	92.17	90.35	93.08	92.37	90.11	90.03
MgO	14.11	13.53	16.75	15.33	16.43	15.72	13.29	7.69	7.67	13.51	9.79	11.7	7.84	7.16	6.65	1.031	2.06	0.9054	2.91	0.4717	0.796	1.0608	1.1484	1.2641	1.0635	0.4816	0.3798	0.7855	0.8349	2.83	2.57	0.5205	0.5273	0.9617	0.9362	0.763	0.8409	0.8064	1.2748	1.3328	0.1657	0.1068	0.1115	0.1373	0.0987	0.2267	0.1605	0.6993	0.629
MnO	0.208	0.1761	0.1271	0.1382	0.1285	0.1375	0.1567	0.3075	0.2495	0.107	0.2357	0.1663	0.4207	0.4174	0.4254	0.4659	0.4523	0.2806	0.2428	0.4807	0.3916	0.3545	0.3723	0.3033	0.4033	0.0584	0.1261	0.1221	1.66	2.23	1.88	1.1062	0.8977	0.3507	0.2763	0.4173	0.292	0.4017	0.2231	0.3106	0.1303	0.096	0.1214	0.0567	0.1166	0.0632	0.151	0.3993	0.3303
NiO	0.1656	0.1883	0.2774	0.1484	0.3148	0.3004	0.1598	0.0615	0.0538	0.0943	0.0687	0.0974	0.0697	0.036	0.2353	0.1714	0.2567	0.5085	0.3867	0.2108	0.2379	0.1627	0.3772	0.3988	0.3621	0.4331	0.1202	0.1146	0.1778	0.5259	0.6992	0.3039	0.3648	0.6612	0.5264	0.5254	0.6834	0.7167	0.6912	0.6773	0.3104	0.4069	0.3447	0.3259	0.382	0.3987	0.3929	0.621	0.7149
CaO	0	0.0158	0	0.0142	0.0111	0	0.0029	0	0.0017	0.0119	0.0018	0	0.0142	0	0.0013	0.0068	0	0.008	0.012	0	0.0126	0.0182	0.003	0.0166	0.0183	0	0.0161	0.0083	0	0.0091	0.0237	0.0135	0.0097	0	0.0148	0.0159	0	0	0	0	0.0125	0.0204	0.004	0.0267	0.0057	0	0	0.0142	0
Na2O	0.0146	0.0119	0.0452	0	0.0628	0.0338	0	0.0497	0.0728	0.002	0.0143	0	0.0315	0.0149	0.1147	0.0325	0.0451	0.001	0.0194	0	0	0	0	0.0585	0.0446	0.0156	0	0	0.0111	0.0628	0	0.0137	0	0	0.0259	0	0	0.0158	0.0311	0.052	0	0.0318	0	0	0.0039	0.0455	0.011	0.0439	0.0571
K2O	0.0026	0.0075	0	0	0.0142	0	0.0021	0.0002	0.0034	0.0195	0	0	0.0106	0	0	0	0	0.0018	0	0.0107	0	0	0	0.0035	0.0011	0.0015	0.0101	0	0.012	0	0	0	0	0	0	0	0.0184	0.0074	0.0011	0.0018	0	0	0.0033	0	0.0082	0	0.0137	0	0.0035
V2O5	0.1914	0.1389	0.1485	0.1194	0.1375	0.1929	0.274	0.1966	0.3032	0.2158	0.202	0.2927	0.2063	0.1665	0.173	0.3345	0.2876	0.1959	0.2647	0.2716	0.2496	0.224	0.1909	0.2547	0.2032	0.1965	0	0	0.1448	0.0823	0.0533	0.1626	0.0491	0.0618	0.0376	0.0314	0.0542	0.0413	0.085	0.1093	0.0667	0.0465	0.0819	0.0848	0.0585	0.0911	0.1098	0.0477	0.0223
CoO	0.1325	0.0426	0.0614	0.0381	0	0.0489	0.1178	0.1551	0.2024	0.118	0.1025	0.0322	0.1627	0.1891	0.1183	0.0951	0.0802	0.1438	0.029	0.1267	0.1089	0.0645	0.0594	0.0887	0.1007	0.1379	0.1654	0.1432	0.2062	0.1277	0.1207	0.1213	0.1292	0.1262	0.1559	0.188	0.1121	0.1459	0.1139	0.1779	0.1817	0.1544	0.0928	0.0664	0.1147	0.0587	0.1293	0.2377	0.0673
ZnO	0.254	0.3338	0.0933	0.1296	0.1795	0.3683	0.1794	1.0077	1.1874	0.1216	0.2592	0.1237	0.5046	1.0767	1.99	0.4261	0.7883	0.1552	0.0733	0.4537	0	0.1182	0.5081	0.4148	0.3722	0.0724	0	0.0619	0.5742	0.5176	0.2912	0.3537	0.361	0.0867	0	0	0	0.0359	0.1616	0.0411	0	0.099	0	0.1285	0.0187	0	0	0	0
Sum	101.506	101.922	100.824	100.766	102.013	101.748	100.255	99.6257	99.7109	99.584	99.4839	99.5587	101.515	101.642	102.345	95.2029	98.573	95.4993	98.2331	95.6805	94.5654	95.1922	95.6237	96.2907	95.7487	95.8536	93.1	93.3649	97.9161	95.916	96.5011	96.3021	96.1828	93.2145	93.4382	93.2734	93.2288	93.4124	95.4292	94.7445	94.5586	94.1039	94.5763	94.233	93.85	94.94	95.1578	93.4699	93.2225
Si	0.0021867	0.0021	0.00108927	0.00176684	0.00106263	0.00111676	0.00104236	0.00253832	0.00231752	0.00198844	0.000886586	0.000792242	0.000269338	0	0.000243825	0.000466448	0.00239521	0.00328764	0.0301338	0.00300547	0.0163322	0.0326836	0.00344731	0.00127834	0.00362208	0.00315306	0.0092665	0.0261716	0.000568771	0.00168488	0.00146687	0.00289569	0.00135706	0.000913496	0.00126155	0.00191601	0.000359417	0.00126366	0.000249831	0.00149728	3.79479e-06	0.00133515	0.00227721	0.00162149	0.00156861	0.000795926	0.000576673	0.000763405	0.00215916
Ti	0.00309578	0.00189179	0.00209686	0.00259136	0.00300152	0.00448706	0.00958664	0.00658322	0.0055691	0.0065321	0.00522395	0.00806063	0.00148795	0.000719359	0.000194726	0.0140684	0.0110469	0.00679359	0.00673928	0.0178237	0.0150293	0.011811	0.0107636	0.00839634	0.00952035	0.00392473	3.46491e-05	0.00038994	0.0174235	0.0151359	0.0151063	0.0196767	0.0181223	0.0044074	0.00423724	0.00336571	0.00352896	0.00417828	0.00473733	0.00466872	0.00644815	0.00681198	0.00561549	0.002405	0.00351093	0.0045512	0.00509469	0.00368656	0.00235555
Al	1.44733	1.46282	1.42573	1.43707	1.37504	1.3644	1.1755	1.13687	1.14355	1.17521	1.17285	1.15942	1.19602	1.16587	1.15549	0.130785	0.338584	0.0789991	0.0971796	0.0338691	0.0739296	0.0937676	0.0851398	0.158042	0.0816857	0.0129071	0.000918394	0.00139265	0.00379857	0.00312918	0.00296677	0.00284102	0.00296839	0	0.000777102	0.000707642	0.000937322	0.000328458	0.00139751	0.00116759	0.000684279	0.00133528	0	0.000533834	0	0.00122258	0.00153698	0.00117864	0.000694836
Cr	0.476155	0.467695	0.489829	0.482136	0.533324	0.539824	0.697394	0.731567	0.738507	0.716039	0.706213	0.722686	0.692318	0.702452	0.688998	0.940118	1.01736	0.571971	0.542423	0.784397	0.740792	0.744753	0.727113	0.713315	0.715198	0.213214	0.000588785	0.000545484	1.06397	0.670455	0.594741	0.672261	0.588185	0.0289804	0.0306431	0.0275034	0.0201004	0.0318564	0.106133	0.112447	0.061506	0.0829412	0.0594147	0.0330493	0.0765293	0.022878	0.0473818	0.0338666	0.0367604
Mg	0.582873	0.55797	0.685005	0.632781	0.670692	0.647689	0.578377	0.352231	0.350919	0.590572	0.44004	0.519395	0.349708	0.321961	0.298366	0.0578063	0.108632	0.050532	0.154823	0.026613	0.0450425	0.0593377	0.0640691	0.0694116	0.0592526	0.0268489	0.0217304	0.0446281	0.0462611	0.156199	0.141181	0.0291754	0.0295451	0.0547878	0.053184	0.043493	0.0479237	0.0458869	0.0708516	0.0745471	0.00937228	0.0060725	0.00630757	0.00778951	0.00562837	0.0127461	0.00901671	0.0397854	0.0358916
Mn	0.00488271	0.00412689	0.00295376	0.00324168	0.00298084	0.00321935	0.0038753	0.00800383	0.00648683	0.00265798	0.00602032	0.00419522	0.0106638	0.0106658	0.0108462	0.0148443	0.013554	0.00889947	0.0073408	0.0154118	0.0125922	0.0112685	0.0118032	0.00946399	0.0127688	0.00185013	0.00409996	0.00394211	0.0522685	0.0699436	0.0586884	0.0352355	0.0285831	0.0113535	0.00891958	0.0135174	0.0094567	0.0129894	0.00704625	0.00987229	0.00418811	0.00310183	0.00390262	0.00182799	0.00377846	0.00201926	0.0048206	0.0129095	0.0107103
Ni	0.00369206	0.00419107	0.00612275	0.00330602	0.00693555	0.00667998	0.00375339	0.00152033	0.00132848	0.0022248	0.00166658	0.00233363	0.00167797	0.000873682	0.00569785	0.00518667	0.00730596	0.0153171	0.011104	0.00641888	0.0072655	0.00491186	0.0113576	0.0118186	0.0108883	0.0130313	0.00371176	0.00351405	0.00531709	0.015666	0.0207303	0.00919365	0.0110317	0.02033	0.0161395	0.0161639	0.0210205	0.0220108	0.0207335	0.020446	0.00947557	0.0124866	0.0105242	0.00997896	0.0117568	0.0120985	0.0119129	0.0190684	0.0220165
Ca	0	0.000468375	0	0.00042133	0.00032571	0	9.07209e-05	0	5.59092e-05	0.000373928	5.81574e-05	0	0.000455304	0	4.19271e-05	0.000274062	0	0.000320951	0.000458932	0	0.000512512	0.0007318	0.00012031	0.000655213	0.000732899	0	0.00066216	0.000338972	0	0.000361042	0.000935869	0.000543943	0.000390681	0	0.000604363	0.000651501	0	0	0	0	0.000508225	0.000833777	0.000162656	0.00108887	0.000233649	0	0	0.000580727	0
Na	0.000784529	0.000638365	0.00240451	0	0.00333468	0.00181151	0	0.0029612	0.00433263	0.000113725	0.000836092	0	0.00182772	0.000871536	0.00669423	0.00237033	0.00309368	7.25997e-05	0.00134262	0	0	0	0	0.00417846	0.00323231	0.00113129	0	0	0.000800043	0.0045088	0	0.000998909	0	0	0.00191391	0	0	0.00116951	0.00224842	0.00378336	0	0.00235197	0	0	0.000289294	0.00332771	0.00080385	0.00324888	0.00423825
K	9.19198e-05	0.000264706	0	0	0.000496092	0	7.82157e-05	7.84008e-06	0.000133131	0.000729527	0	0	0.000404655	0	0	0	0	8.59779e-05	0	0.000516654	0	0	0	0.000164478	5.24507e-05	7.15682e-05	0.000494566	0	0.000569051	0	0	0	0	0	0	0	0.000897455	0.000360378	5.23226e-05	8.61643e-05	0	0	0.000159768	0	0.000400192	0	0.000658692	0	0.000170922
V	0.00350477	0.00253914	0.00269201	0.00218467	0.00248805	0.00352304	0.00528576	0.00399169	0.0061491	0.00418158	0.00402468	0.00575977	0.00407906	0.00331875	0.00344069	0.0083135	0.0067228	0.00484653	0.00624264	0.00679248	0.00626074	0.00555414	0.00472098	0.00619942	0.00501839	0.00485594	0	0	0.00355648	0.00201355	0.0012979	0.00404006	0.00121949	0.00156064	0.000946829	0.000793406	0.00136923	0.00104174	0.0020941	0.00270992	0.00167232	0.00117198	0.00205372	0.00213259	0.00147874	0.00227046	0.0027343	0.00120296	0.00056405
Co	0.00294451	0.00094509	0.00135082	0.000846031	0	0.00108386	0.00275792	0.00382177	0.00498164	0.00277492	0.00247847	0.000768985	0.00390416	0.00457438	0.00285538	0.00286845	0.00227518	0.00431753	0.000830027	0.00384552	0.00331504	0.00194092	0.00178276	0.00262014	0.00301821	0.00413575	0.00509096	0.00437679	0.00614639	0.0037917	0.00356699	0.00365769	0.00389439	0.00386771	0.00476441	0.00576505	0.00343686	0.00446626	0.00340551	0.00535294	0.00552876	0.00472274	0.00282414	0.00202656	0.00351868	0.00177547	0.00390771	0.00727512	0.00206589
Zn	0.0051974	0.00681876	0.00189002	0.00264985	0.00362957	0.00751661	0.00386736	0.0228633	0.02691	0.00263304	0.00577098	0.00272011	0.0111492	0.0239823	0.044227	0.0118341	0.0205915	0.00429065	0.00193176	0.0126795	0	0.00327507	0.0140414	0.0112822	0.0102719	0.00199933	0	0.00174204	0.0157598	0.0141512	0.00792393	0.00982058	0.0100194	0.00244663	0	0	0	0.0010119	0.00444892	0.00113871	0	0.00278829	0	0.00361118	0.000528218	0	0	0	0
Fe3+	0.0563104	0.0547836	0.0723935	0.0655191	0.0798773	0.0758146	0.0900677	0.104309	0.0881877	0.0800071	0.0974783	0.0829119	0.0981453	0.121153	0.151009	0.877457	0.600096	1.31449	1.26927	1.12021	1.10377	1.05583	1.14516	1.09504	1.16506	1.74636	1.98039	1.94494	0.886942	1.29124	1.36525	1.26863	1.36623	1.9557	1.95666	1.95885	1.96798	1.95534	1.87851	1.86979	1.91989	1.89827	1.9188	1.95197	1.90956	1.96172	1.933	1.95569	1.95623
Fe2+	0.410949	0.432743	0.306439	0.365482	0.316815	0.342838	0.428323	0.622726	0.620572	0.41396	0.556454	0.49096	0.627892	0.643557	0.631897	0.933607	0.868342	0.935779	0.870184	0.968412	0.975155	0.974137	0.920478	0.908136	0.919677	0.966519	0.973017	0.96802	0.896614	0.751718	0.786142	0.941028	0.938454	0.915657	0.919953	0.927278	0.922994	0.9181	0.898088	0.89249	0.980724	0.975781	0.987959	0.981969	0.981214	0.974593	0.978557	0.920739	0.92614
Sum	3	3	3	3	3	3	3	3	3	3	3	3	3	3	3	3	3	3	3	3	3	3	3	3	3	3	3	3	3	3	3	3	3	3	3	3	3	3	3	3	3	3	3	3	3	3	3	3	3
Site X
Fe2+	0.410949	0.432743	0.306439	0.365482	0.316815	0.342838	0.428323	0.622726	0.620572	0.41396	0.556454	0.49096	0.627892	0.643557	0.631897	0.933607	0.868342	0.935779	0.870184	0.968412	0.975155	0.974137	0.920478	0.908136	0.919677	0.966519	0.973017	0.96802	0.896614	0.751718	0.786142	0.941028	0.938454	0.915657	0.919953	0.927278	0.922994	0.9181	0.898088	0.89249	0.980724	0.975781	0.987959	0.981969	0.981214	0.974593	0.978557	0.920739	0.92614
Ca	0	0.000468375	0	0.00042133	0.00032571	0	9.07209e-05	0	5.59092e-05	0.000373928	5.81574e-05	0	0.000455304	0	4.19271e-05	0.000274062	0	0.000320951	0.000458932	0	0.000512512	0.0007318	0.00012031	0.000655213	0.000732899	0	0.00066216	0.000338972	0	0.000361042	0.000935869	0.000543943	0.000390681	0	0.000604363	0.000651501	0	0	0	0	0.000508225	0.000833777	0.000162656	0.00108887	0.000233649	0	0	0.000580727	0
Mn	0.00488271	0.00412689	0.00295376	0.00324168	0.00298084	0.00321935	0.0038753	0.00800383	0.00648683	0.00265798	0.00602032	0.00419522	0.0106638	0.0106658	0.0108462	0.0148443	0.013554	0.00889947	0.0073408	0.0154118	0.0125922	0.0112685	0.0118032	0.00946399	0.0127688	0.00185013	0.00409996	0.00394211	0.0522685	0.0699436	0.0586884	0.0352355	0.0285831	0.0113535	0.00891958	0.0135174	0.0094567	0.0129894	0.00704625	0.00987229	0.00418811	0.00310183	0.00390262	0.00182799	0.00377846	0.00201926	0.0048206	0.0129095	0.0107103
Mg	0.582873	0.55797	0.685005	0.632781	0.670692	0.647689	0.578377	0.352231	0.350919	0.590572	0.44004	0.519395	0.349708	0.321961	0.298366	0.0578063	0.108632	0.050532	0.154823	0.026613	0.0450425	0.0593377	0.0640691	0.0694116	0.0592526	0.0268489	0.0217304	0.0446281	0.0462611	0.156199	0.141181	0.0291754	0.0295451	0.0547878	0.053184	0.043493	0.0479237	0.0458869	0.0708516	0.0745471	0.00937228	0.0060725	0.00630757	0.00778951	0.00562837	0.0127461	0.00901671	0.0397854	0.0358916
Ni	0.00369206	0.00419107	0.00612275	0.00330602	0.00693555	0.00667998	0.00375339	0.00152033	0.00132848	0.0022248	0.00166658	0.00233363	0.00167797	0.000873682	0.00569785	0.00518667	0.00730596	0.0153171	0.011104	0.00641888	0.0072655	0.00491186	0.0113576	0.0118186	0.0108883	0.0130313	0.00371176	0.00351405	0.00531709	0.015666	0.0207303	0.00919365	0.0110317	0.02033	0.0161395	0.0161639	0.0210205	0.0220108	0.0207335	0.020446	0.00947557	0.0124866	0.0105242	0.00997896	0.0117568	0.0120985	0.0119129	0.0190684	0.0220165
Zn	0.0051974	0.00681876	0.00189002	0.00264985	0.00362957	0.00751661	0.00386736	0.0228633	0.02691	0.00263304	0.00577098	0.00272011	0.0111492	0.0239823	0.044227	0.0118341	0.0205915	0.00429065	0.00193176	0.0126795	0	0.00327507	0.0140414	0.0112822	0.0102719	0.00199933	0	0.00174204	0.0157598	0.0141512	0.00792393	0.00982058	0.0100194	0.00244663	0	0	0	0.0010119	0.00444892	0.00113871	0	0.00278829	0	0.00361118	0.000528218	0	0	0	0
Co	0.00294451	0.00094509	0.00135082	0.000846031	0	0.00108386	0.00275792	0.00382177	0.00498164	0.00277492	0.00247847	0.000768985	0.00390416	0.00457438	0.00285538	0.00286845	0.00227518	0.00431753	0.000830027	0.00384552	0.00331504	0.00194092	0.00178276	0.00262014	0.00301821	0.00413575	0.00509096	0.00437679	0.00614639	0.0037917	0.00356699	0.00365769	0.00389439	0.00386771	0.00476441	0.00576505	0.00343686	0.00446626	0.00340551	0.00535294	0.00552876	0.00472274	0.00282414	0.00202656	0.00351868	0.00177547	0.00390771	0.00727512	0.00206589
Sum	1.01054	1.00726	1.00376	1.00873	1.00138	1.00903	1.02104	1.01117	1.01125	1.0152	1.01249	1.02037	1.00545	1.00561	0.993931	1.02642	1.0207	1.01946	1.04667	1.03338	1.04388	1.0556	1.02365	1.01339	1.01661	1.01438	1.00831	1.02656	1.02237	1.01183	1.01917	1.02865	1.02192	1.00844	1.00356	1.00687	1.00483	1.00447	1.00457	1.00385	1.0098	1.00579	1.01168	1.00829	1.00666	1.00323	1.00821	1.00036	0.996824
Site Y
Fe3+	0.0563104	0.0547836	0.0723935	0.0655191	0.0798773	0.0758146	0.0900677	0.104309	0.0881877	0.0800071	0.0974783	0.0829119	0.0981453	0.121153	0.151009	0.877457	0.600096	1.31449	1.26927	1.12021	1.10377	1.05583	1.14516	1.09504	1.16506	1.74636	1.98039	1.94494	0.886942	1.29124	1.36525	1.26863	1.36623	1.9557	1.95666	1.95885	1.96798	1.95534	1.87851	1.86979	1.91989	1.89827	1.9188	1.95197	1.90956	1.96172	1.933	1.95569	1.95623
Al	1.44733	1.46282	1.42573	1.43707	1.37504	1.3644	1.1755	1.13687	1.14355	1.17521	1.17285	1.15942	1.19602	1.16587	1.15549	0.130785	0.338584	0.0789991	0.0971796	0.0338691	0.0739296	0.0937676	0.0851398	0.158042	0.0816857	0.0129071	0.000918394	0.00139265	0.00379857	0.00312918	0.00296677	0.00284102	0.00296839	0	0.000777102	0.000707642	0.000937322	0.000328458	0.00139751	0.00116759	0.000684279	0.00133528	0	0.000533834	0	0.00122258	0.00153698	0.00117864	0.000694836
Cr	0.476155	0.467695	0.489829	0.482136	0.533324	0.539824	0.697394	0.731567	0.738507	0.716039	0.706213	0.722686	0.692318	0.702452	0.688998	0.940118	1.01736	0.571971	0.542423	0.784397	0.740792	0.744753	0.727113	0.713315	0.715198	0.213214	0.000588785	0.000545484	1.06397	0.670455	0.594741	0.672261	0.588185	0.0289804	0.0306431	0.0275034	0.0201004	0.0318564	0.106133	0.112447	0.061506	0.0829412	0.0594147	0.0330493	0.0765293	0.022878	0.0473818	0.0338666	0.0367604
Sum	1.9798	1.9853	1.98796	1.98473	1.98824	1.98003	1.96296	1.97275	1.97025	1.97126	1.97654	1.96501	1.98648	1.98948	1.9955	1.94836	1.95604	1.96546	1.90887	1.93848	1.91849	1.89435	1.95742	1.9664	1.96194	1.97248	1.98189	1.94688	1.95472	1.96483	1.96296	1.94373	1.95738	1.98468	1.98808	1.98706	1.98901	1.98752	1.98604	1.98341	1.98208	1.98254	1.97821	1.98555	1.98609	1.98582	1.98192	1.99074	1.99369
[truncated: 56 more columns]
