# Supplementary material for: Trace and ultratrace elements in spinel subgroup minerals of ultramafic rocks from the Voltri Massif (NW Italy): the influence of microstructure and texture
Source: Copernicus journal article supplement (doi:10.5194/ejm-35-1091-2023), 2023-12-12
Supplement: Supplementary file 2 [file Table LA-ICP.xlsx]

## Sheet: LA-ICP
Rock	Partially serpentinized peridotites																			Massive serpentinites																					Foliated serpentinites
Microstructure	Porphyroclasts																			Porphyroclasts						Re-crystalized porphyroclasts								Serpentine texture							Re-oriented crystal
Spot	RG_R1B_60	RG_R1B_61	RG_R1B_62	RG_R1B_63	RG_R1B_64	RG_R1B_67	RG_R1B_68	RG_R2B_90	RG_R2B_91	RG_R2B_92	RG_R2B_93	RG_R2B_96	RG_R2B_97	RG_R2B_98	RG_R2B_99	RG_R3A_111	RG_R4_27	RG_R4_28	RG_R4_31	BG_R3_124	BG_R3_125	BG_R3_130	BG_R3_131	BG_R3_132	BG_R3_133	BG_R4_213	BG_R4_214	BG_R4_215	BG_R4_216	BG_R4_217	BG_R4_218	BG_R4_219	BG_R4_220	BG_R3_113	BG_R3_114	BG_R3_118	BG_R3_119	BG_R3_120	BG_R3_134	BG_R3_135	BG_R1_144	BG_R1_145	BG_R1_146	BG_R1_147	BG_R1_155	BG_R1_156	BG_R1_160	BG_R1_161	BG_R1_162
Li	0.35	0.49	0.66	2.4	1.9	0.63	1.1	0.6	0.69	0.42	0.19	0.52	0.44	0.49	0.51	0.43	0.68	0.12	0.79	0.52	0.43	12.7	15.1	10.7	13.6	0.46	0.51	0.43	0.69	0.28	0.4	0.36	0.5	6.2	4.1	0.47	0.45	0.4	0.43	0.55	0.53	0.63	0.49	1.1	0.28	0.42	0.47	0.45	0.64
Na	1080	76	93	27	1800	8.8	12	169	5.4	53	28	6.2	4.2	75	1100	4.8	100	1.4	330	5.1	90	4.5	5.1	4.4	144	4.7	4.6	4.9	7.3	2.8	4.3	3.3	6	5.5	39	5.2	6.3	4.2	4.8	7.3	8.3	7.3	4.2	6.3	65	6.6	4.7	4.7	6.8
Cr	133200	143700	193800	622000	540000	225400	425800	234000	221300	288000	156200	220200	210500	229000	278000	117000	219400	90100	331000	7990	8420	101100	203000	167000	136800	123000	71000	136000	28700	15600	32600	105000	19600	8170	9510	7960	10000	7290	6370	6080	8480	13310	15850	15280	22600	14210	6980	3550	8670
Mg	112000	74550	126500	368600	350000	154500	305600	71300	74200	46700	17420	83400	91900	78400	161000	80000	61200	8820	57600	41100	49000	19400	38700	40000	32800	18800	6800	20600	37000	2910	10200	21200	6200	24000	6670	14100	60600	6020	25900	64000	23500	58000	14300	81100	14200	123000	12300	1920	38000
Al	172000	216500	317400	1037000	859000	369800	722000	225300	210400	102500	31900	213100	206900	93000	110000	28000	206700	4750	203000	1240	1530	884	2080	1660	1580	890	275	870	720	106	253	1230	200	580	103.3	297	2040	61	680	1840	960	2490	600	3300	720	5200	490	102	1680
Si	60000	190	3000	100	82000	270	24400	260	160	18100	8720	180	7400	43500	107000	58000	9700	4300	4700	32100	36000	6460	18400	22700	16400	13100	4900	14800	33000	1450	7500	16100	5600	17000	2000	7100	46100	150	18400	52000	19400	51000	11600	72700	11900	105000	11200	150	32000
P	2.2	3.8	4.7	18	12	4.6	12	43	3.5	2.9	1.7	3.4	2.4	2.5	3.7	2.6	4.7	1	5.9	4	50	2	3.1	3.2	2.7	2.8	3	3.3	4	1.4	2.8	2.6	3.4	3.4	2.3	3.5	4.1	3.1	2.9	4.7	3.7	3.5	3	3.8	2.7	3.7	2.7	2.6	3.4
K	26.9	0.96	1.6	5.2	4.4	1.8	3	1.3	1.3	0.93	0.45	1.3	1	19.8	64	1	1.1	0.24	2	0.93	14.7	0.79	0.97	0.86	0.94	1.1	0.87	1.1	13.5	0.48	0.75	0.81	0.89	1.2	0.76	0.8	29	20.6	26	80	1.2	1.3	1.1	0.99	0.92	12.9	1	0.93	1.3
Ca	690	25	28	120	89	32	66	29	22	14	9	22	18	190	570	16	220	6.7	45	24	26	17	20	20	18	230	26	18	33	12	19	17	22	24	16	19	27	21	23	240	29	25	22	29	19	25	19	22	29
Sc	3.11	0.097	0.15	0.53	0.34	0.12	4.4	0.11	0.088	0.87	0.48	1.1	0.87	1.97	3.49	4.1	0.091	0.42	0.17	2.92	3.7	1.82	3.88	3.46	3.12	1.74	1.41	2.72	2.5	0.76	1.14	2.56	0.11	1.9	0.97	1.38	4.1	0.075	1.58	4.7	1.84	4.8	1.43	5.9	1.33	7.9	2.13	0.086	3.3
Ti	721	619	986	2540	3500	1257	2310	2640	2220	2780	1785	2102	2023	2487	3156	2270	478	1190	1800	892	1047	2860	4810	3660	3810	3110	2170	3330	1260	720	1270	2750	1127	874	905	905	971	908	837	836	1601	1825	1566	1540	1542	1500	1365	1330	1366
V	737	707	954	3165	2767	1095	2123	1750	1692	2175	1319	1686	1610	1919	2366	940	1560	788	2600	359	375	563	677	604	608	689	666	755	540	318	553	628	497	375	356.1	361	371	352	337	346	467	497	468	479	492	469	464	441	513
Mn	1967	1759	1728	7417	8520	1641	3624	3184	2613	6590	3978	2217	2010	5220	6540	3740	4290	1931	6700	3120	3370	16210	31900	26400	22270	7300	3950	7700	1880	930	1700	6160	1011	3163	3310	3188	3590	3270	3160	3240	1021	1204	1131	1131	1682	1530	943	1066	1074
Co	547	338.4	478.1	1607	2610	563	1112	732.4	529	688	281.7	514.9	496.4	594	704	369	994	174.4	1235	404	425	643	1058	940	818	393	312	381	253	130	225	339	203	386	407.4	373.2	418	382	357	353	200.8	231	196.1	199	212.8	226	190.2	190.2	215
Ni	1574	1777	2885	8770	6306	3531	7010	1381	1549	2430	1317	1755	1680	2039	2618	2110	1133	1480	2846	6080	6660	7450	7900	7210	7900	3380	3990	3370	3740	2060	3770	3300	3400	6340	6360	5960	6690	6070	5890	5860	3170	3550	3040	3490	3370	3960	2990	2890	3420
Cu	0.098	0.18	0.26	0.75	44	0.28	0.46	0.2	0.18	13.3	0.056	0.17	4.2	8.7	11.9	0.098	0.17	0.49	0.3	5.9	11.4	0.11	0.14	5.9	0.13	0.14	0.16	0.12	3.4	0.074	0.12	131	0.13	0.15	0.11	0.13	7.5	0.13	3.1	5.7	3.3	6.7	1.7	7.8	2	8.7	0.12	0.13	10.6
Zn	6250	1330	1751	5700	14700	2228	4510	3560	2490	9470	4200	2710	2560	8110	10300	2430	11800	1657	19200	195	193	2760	8000	7000	4980	1790	750	1730	490	114	236	1440	95.6	181	224	193	228	227	170	171	73.9	77.8	78.4	93.3	137.7	86	61.1	67.8	64.1
Ga	50.5	66.8	91.6	312	310	113.1	228.5	112.1	107.2	55.7	22.7	111.1	100.7	70.1	83.9	6.3	74.8	5.05	74.6	1.27	1.15	2.8	4.98	3.27	4.6	3.5	3.58	4.63	2.34	1.56	1.92	4.8	2.22	1.2	1.26	1.15	1.3	1.43	1.37	2.18	1.65	2.81	1.26	2.8	2.58	3.27	1.77	1.71	2.16
Rb	0.028	0.047	0.062	0.19	0.14	0.08	0.11	0.046	0.04	0.03	0.017	0.043	0.039	0.026	0.038	0.031	0.046	0.011	0.073	0.032	0.038	0.025	0.033	0.036	0.032	0.034	0.039	0.028	0.047	0.016	0.026	0.027	0.035	0.037	0.029	1.1	0.61	0.026	0.032	12	0.047	0.045	0.045	0.04	0.026	0.043	0.037	0.036	0.044
Sr	1.46	0.0034	0.0033	0.013	1.54	0.005	0.63	0.095	0.0029	1.11	0.387	0.029	0.15	1.22	1.97	0.473	0.215	0.176	0.58	0.48	0.84	0.42	0.62	0.201	0.559	0.38	0.27	0.82	0.55	0.057	0.07	0.43	0.065	0.11	0.052	0.25	1.18	0.154	0.73	1.48	0.276	0.95	0.37	1.21	0.35	0.96	0.3	0.028	1.03
Y	0.51	0.0033	0.0039	0.013	0.89	0.0054	0.017	0.0039	0.0029	0.056	0.041	0.0043	0.0035	0.153	0.213	0.53	0.0039	0.012	0.128	1.05	1.5	1.32	3.35	1.42	2.56	2.06	1.81	2.43	2.4	0.27	0.61	2	0.323	0.14	0.0028	0.241	1.39	0.195	0.43	0.63	0.51	1.66	0.31	0.61	0.3	1.91	0.33	0.276	2.42
Zr	0.55	0.12	0.147	0.64	0.92	0.18	0.023	0.0092	0.011	0.143	0.07	0.2	0.094	0.2	0.48	0.73	0.139	0.065	0.37	0.87	0.89	1.55	4.51	1.18	3.52	0.18	0.104	0.23	0.15	0.0046	0.09	0.169	0.0072	0.168	0.0059	0.28	0.2	0.059	0.084	0.21	0.0078	0.32	0.0076	0.108	0.0039	0.36	0.0046	0.0045	0.15
Nb	0.056	0.091	0.146	0.45	0.3	0.147	0.37	0.171	0.112	0.233	0.082	0.142	0.112	0.167	0.152	0.0037	0.154	0.047	0.149	0.098	1.9	0.322	0.87	0.23	1.04	0.44	0.39	0.31	0.132	0.029	0.075	0.53	0.14	0.0032	0.0038	0.0034	0.1	0.0061	0.0036	0.088	0.24	0.63	0.21	0.3	0.151	3.1	0.111	0.0043	0.36
Sn	1.05	0.3	0.049	0.12	0.085	0.035	0.075	0.024	0.33	0.021	0.0097	0.26	0.023	0.014	0.58	0.28	1.9	0.1	0.04	1.6	4.6	1.13	2.41	2.02	1.78	1.43	1.23	2.9	1.9	0.58	0.81	1.27	1.22	0.43	0.93	2.2	6.7	1.6	3.2	9	1	0.86	1.18	8.1	1.72	1.13	0.83	1.32	0.61
Cs	0.0067	0.0099	0.013	0.051	0.26	0.015	0.038	0.012	0.0088	0.0074	0.005	0.013	0.011	0.0071	0.0087	0.0087	0.014	0.0023	0.016	0.0069	0.01	0.0066	0.01	0.01	0.0071	0.0093	0.0099	0.01	0.012	0.0048	0.0081	0.0078	0.009	0.012	0.0064	0.16	0.254	0.0081	0.24	0.57	0.011	0.011	0.0092	0.014	0.0069	0.5	0.0076	0.01	0.014
Ba	2.43	0.011	0.014	0.0098	6.3	0.016	0.44	0.012	0.0098	2.35	1.3	0.015	0.01	1.64	2.51	2.11	0.11	0.0037	0.13	0.99	0.75	0.59	2.19	1.2	1.56	3.1	1.93	1.52	0.79	0.23	0.39	2.48	0.016	0.017	0.0098	1.23	6.7	0.68	5.8	9.8	0.44	0.79	0.17	0.59	0.54	0.94	0.014	0.016	0.93
La	0.0059	0.0032	0.0059	0.0059	0.005	0.0059	0.0059	0.0059	0.002	0.0059	0.00061	0.0059	0.0059	0.0059	0.034	0.0059	0.0059	0.0059	0.0059	0.139	0.25	0.193	0.3	0.199	0.196	0.191	0.47	0.153	0.36	0.001	0.112	0.39	0.063	0.024	0.001	0.0059	0.49	0.0059	0.5	0.64	0.37	0.58	0.24	0.232	0.157	1.09	0.12	0.192	1.62
Ce	0.065	0.0014	0.0026	0.0061	0.0029	0.002	0.0029	0.0029	0.0029	0.001	0.00059	0.0014	0.0029	0.0029	0.031	0.086	0.36	0.0029	0.0022	0.255	0.241	0.348	0.95	0.41	0.688	0.8	1.79	0.63	0.43	0.097	0.25	0.9	0.205	0.052	0.021	0.173	1.02	0.045	5.5	3.3	0.096	0.56	0.02	0.099	0.045	0.29	0.061	0.0016	0.093
Pr	0.0063	0.0063	0.0063	0.0047	0.13	0.0016	0.0029	0.0063	0.0063	0.00081	0.00046	0.0063	0.001	0.0063	0.0013	0.0063	0.0026	0.0063	0.0063	0.061	0.018	0.069	0.146	0.064	0.087	0.158	0.204	0.102	0.23	0.0023	0.039	0.166	0.015	0.0063	0.00076	0.0063	0.19	0.0063	0.106	0.139	0.108	0.238	0.075	0.034	0.036	0.211	0.04	0.046	0.34
Nd	0.0041	0.0089	0.0089	0.028	0.022	0.0092	0.017	0.0097	0.0089	0.0089	0.0089	0.0089	0.0059	0.0074	0.0055	0.084	0.0068	0.0015	0.0089	0.27	0.61	0.3	0.89	0.39	0.88	0.86	1.06	0.61	0.91	0.087	0.16	1.08	0.32	0.19	0.0089	0.19	0.71	0.0089	0.49	0.49	0.45	0.76	0.22	0.52	0.17	0.77	0.07	0.2	1.73
Sm	0.0048	0.01	0.014	0.032	0.054	0.015	0.0025	0.011	0.0072	0.011	0.0069	0.01	0.0096	0.0025	0.011	0.072	0.0079	0.0025	0.023	0.26	0.09	0.11	0.35	0.14	0.37	0.019	0.34	0.39	0.58	0.0079	0.014	0.37	0.007	0.0098	0.0073	0.0081	0.17	0.0058	0.018	0.0025	0.19	0.49	0.09	0.27	0.0056	0.38	0.085	0.014	0.71
Eu	0.0077	0.0021	0.0039	0.016	0.0077	0.0077	0.0077	0.0023	0.0077	0.0022	0.0015	0.0077	0.0077	0.0077	0.021	0.0077	0.03	0.0077	0.0077	0.14	0.04	0.077	0.078	0.0077	0.095	0.053	0.109	0.08	0.16	0.001	0.0027	0.137	0.002	0.002	0.0077	0.0077	0.047	0.0077	0.0077	0.03	0.0055	0.093	0.011	0.0049	0.0049	0.127	0.03	0.0026	0.157
Gd	0.0046	0.0072	0.0046	0.031	0.025	0.011	0.019	0.0046	0.0046	0.0054	0.0042	0.012	0.0046	0.0084	0.0063	0.011	0.0046	0.0018	0.0046	0.22	0.37	0.3	0.58	0.19	0.41	0.37	0.63	0.27	0.64	0.087	0.18	0.51	0.0068	0.14	0.0046	0.0046	0.37	0.0046	0.33	0.26	0.013	0.27	0.0086	0.16	0.0086	0.28	0.19	0.0086	0.34
Tb	0.0025	0.0025	0.0025	0.0025	0.0051	0.0025	0.0025	0.0012	0.001	0.00079	0.00063	0.0025	0.0017	0.0025	0.021	0.012	0.0025	0.0042	0.0025	0.08	0.056	0.039	0.139	0.054	0.087	0.035	0.085	0.039	0.13	0.00052	0.017	0.04	0.04	0.0014	0.00075	0.00083	0.079	0.032	0.04	0.048	0.015	0.05	0.0011	0.088	0.00081	0.072	0.026	0.00094	0.131
Dy	0.102	0.0072	0.0072	0.026	0.19	0.0062	0.011	0.0065	0.0041	0.037	0.0018	0.0072	0.0072	0.0072	0.0072	0.2	0.0045	0.0062	0.0096	0.29	0.25	0.28	0.61	0.25	0.67	0.51	0.52	0.44	0.99	0.095	0.103	0.38	0.101	0.097	0.0072	0.1	0.54	0.0072	0.35	0.4	0.13	0.25	0.079	0.0089	0.069	0.66	0.15	0.105	0.54
Ho	0.0047	0.0047	0.0047	0.0047	0.0047	0.0016	0.0047	0.0047	0.0011	0.0047	0.00046	0.0015	0.001	0.0047	0.0021	0.0047	0.0047	0.0047	0.0047	0.076	0.117	0.077	0.157	0.0047	0.104	0.093	0.09	0.077	0.116	0.0013	0.031	0.082	0.0022	0.0047	0.0047	0.026	0.097	0.0047	0.047	0.0047	0.0013	0.098	0.016	0.0013	0.012	0.159	0.0022	0.0014	0.14
Er	0.0089	0.0089	0.0041	0.0089	0.0089	0.0089	0.014	0.0034	0.0089	0.0032	0.0018	0.0031	0.0089	0.0089	0.0037	0.0089	0.0089	0.0089	0.0089	0.14	0.21	0.23	0.52	0.102	0.34	0.22	0.28	0.23	0.37	0.0041	0.14	0.26	0.06	0.0089	0.0089	0.0024	0.123	0.0089	0.103	0.105	0.109	0.23	0.07	0.073	0.051	0.17	0.108	0.0041	0.32
Tm	0.00092	0.0017	0.0026	0.0026	0.0035	0.0021	0.0053	0.0019	0.0026	0.014	0.0013	0.0026	0.0013	0.0017	0.0017	0.028	0.014	0.00025	0.0026	0.026	0.067	0.023	0.084	0.0014	0.055	0.057	0.0038	0.046	0.064	0.0125	0.00079	0.039	0.00098	0.00097	0.001	0.0026	0.0026	0.015	0.036	0.026	0.028	0.086	0.0019	0.017	0.0013	0.067	0.018	0.00091	0.059
Yb	0.097	0.0066	0.0066	0.041	0.032	0.014	0.036	0.0066	0.0065	0.005	0.0028	0.0066	0.0062	0.0066	0.0066	0.142	0.0066	0.0016	0.0066	0.35	0.15	0.24	0.31	0.14	0.37	0.31	0.2	0.26	0.19	0.0079	0.081	0.29	0.0079	0.0063	0.0066	0.0066	0.23	0.0066	0.12	0.07	0.15	0.43	0.09	0.2	0.072	0.52	0.0079	0.0079	0.62
Lu	0.0053	0.0053	0.0053	0.0053	0.0053	0.0016	0.0029	0.0053	0.0053	0.0053	0.0053	0.0018	0.0053	0.0053	0.0053	0.00061	0.0053	0.0053	0.0053	0.018	0.059	0.034	0.106	0.02	0.075	0.035	0.0067	0.0067	0.079	0.0067	0.0067	0.037	0.0067	0.015	0.00077	0.00061	0.045	0.00085	0.035	0.01	0.0012	0.0067	0.0067	0.0067	0.0067	0.068	0.0067	0.0067	0.086
Hf	0.0039	0.0039	0.0039	0.016	0.013	0.0039	0.0099	0.004	0.0039	0.0039	0.0022	0.0037	0.0034	0.0039	0.0039	0.055	0.0039	0.0009	0.0039	0.0039	0.0036	0.111	0.23	0.046	0.068	0.0049	0.0049	0.0045	0.013	0.0078	0.0078	0.0026	0.0035	0.0039	0.0026	0.0039	0.0077	0.0058	0.0032	0.066	0.004	0.0078	0.0078	0.0078	0.0028	0.0078	0.0047	0.0078	0.0044
Ta	0.0018	0.0011	0.0018	0.0047	0.0018	0.0018	0.0018	0.0018	0.0018	0.0018	0.0018	0.0018	0.0018	0.0018	0.0013	0.0011	0.0012	0.00037	0.0018	0.0018	0.0015	0.0018	0.022	0.0018	0.058	0.0024	0.0024	0.0024	0.0019	0.0011	0.0024	0.0024	0.0024	0.0014	0.0011	0.0018	0.001	0.0012	0.00095	0.0018	0.0012	0.044	0.0024	0.0024	0.0024	0.194	0.00098	0.0024	0.07
Pb	0.0054	0.015	0.019	0.043	0.49	0.017	0.038	0.012	0.011	0.0084	0.0056	0.015	0.01	0.012	0.015	0.0091	0.011	0.0031	0.018	0.82	1.22	1.1	1.44	1.14	1.78	0.47	1.08	0.4	0.79	0.089	0.21	0.98	0.14	0.16	0.008	0.39	0.78	0.0085	0.35	0.37	1.09	2.68	0.205	1.16	0.7	2.17	0.55	0.57	2.71
Th	0.0016	0.0016	0.0016	0.0016	0.0016	0.0016	0.0016	0.0016	0.0016	0.0016	0.0016	0.0016	0.0016	0.0016	0.0016	0.0016	0.0016	0.0016	0.0016	0.0016	0.043	0.0016	0.028	0.0016	0.025	0.003	0.003	0.003	0.003	0.003	0.003	0.003	0.003	0.0016	0.0016	0.0016	0.0016	0.0016	0.0016	0.022	0.043	0.06	0.003	0.04	0.003	0.15	0.003	0.003	0.127
U	0.00086	0.0013	0.0018	0.0058	0.0046	0.0022	0.0072	0.0025	0.0013	0.001	0.0022	0.07	0.0012	0.0022	0.013	0.001	0.0014	0.015	0.0022	0.002	0.0025	0.07	0.064	0.037	0.076	0.0018	0.0038	0.0038	0.0023	0.0038	0.001	0.0014	0.0014	0.0021	0.0016	0.023	0.0018	0.0022	0.014	0.043	0.0029	0.049	0.0038	0.022	0.0038	0.201	0.0038	0.017	0.11
[truncated: 14 more columns]
